# Supplementary material for: Understanding the Thermal Degradation Mechanism of High-Temperature-Resistant Phthalonitrile Foam at Macroscopic and Molecular Levels
Source: MDPI journal article supplement (doi:10.3390/polym15193947), 2023-09-29
Supplement: s1 [file s1]

*Supporting information for*

**Understanding the thermal degradation mechanism of high-temperature-resistant phthalonitrile foam at macroscopic and molecular levels**

Xulin Yang<sup>1,2,3\*</sup>, Yi Li<sup>1</sup>, Wenwu Lei<sup>1,4</sup>, Zhongxiang Bai<sup>3</sup>, Yingqing Zhan<sup>5</sup>, Ying Li<sup>1</sup>, Kui Li<sup>1</sup>, Pan Wang<sup>1</sup>, Wei Feng<sup>1</sup>, Qi Liu<sup>2\*</sup>

*1 School of Mechanical Engineering, Chengdu University, Chengdu, 610106, P. R. China*

*2 Chemical Synthesis and Pollution Control Key Laboratory of Sichuan Province, China West Normal University, Nanchong, 637009, P. R. China*

*3 Institute for Advanced Study, Chengdu University, Chengdu 610106, China*

*4 Chengdu Hongbo Industrial Co.,Ltd., Chengdu,610199,China*

*5 College of Chemistry and Chemical Engineering, Southwest Petroleum University, Chengdu,610500, P. R. China*

Email address:

[yangxulin@cdu.edu.cn](mailto:yangxulin@cdu.edu.cn)

[liuqi@cwnu.edu.cn](mailto:liuqi@cwnu.edu.cn)

**Content:**

**Table. S1 Main information of PN foam in Raman spectra**

**Table. S2 FWHM values of PN foam on d<sub>002</sub>**

**Table S3 bond energy of covalent bond in PN foam**

**Figure. S1. Bubble types in PN foams**

**Figure. S2 TGA/DTG curves of azodicarbonamide**

**Figure. S3. DSC curve of (a) original PN foam and (b) PN foam after after thermal treatment at 300 °C/1h**

**Figure. S4 The ionic signal of NO**

**Figure. S5 The ionic signals of aromatics**

---

\* Corresponding author. E-mail address: [yangxulin@cdu.edu.cn](mailto:yangxulin@cdu.edu.cn)

\* Corresponding author. E-mail address: [liuqi@cwnu.edu.cn](mailto:liuqi@cwnu.edu.cn)

**Table. S1 Main information of PN foam in Raman spectra**

| <b>Sample</b>                  | <b>F200</b> | <b>F400</b> | <b>F600</b> | <b>F800</b> | <b>F1000</b> |
|--------------------------------|-------------|-------------|-------------|-------------|--------------|
| I <sub>D</sub> /I <sub>G</sub> | 0.8441      | 0.8439      | 0.8061      | 0.9669      | 0.9996       |
| D band (cm <sup>-1</sup> )     | 1352.4      | 1352.4      | 1348.5      | 1333.1      | 1336.9       |
| G band (cm <sup>-1</sup> )     | 1564.5      | 1572.3      | 1583.8      | 1585.7      | 1591.5       |
| 2D band (cm <sup>-1</sup> )    | 2843.1      | 2779.4      | 2825.7      | 2862.3      | 2852.7       |

**Table. S2 FWHM values of PN foam on d<sub>002</sub>**

| <b>Sample</b> | <b>F200</b> | <b>F400</b> | <b>F600</b> | <b>F800</b> | <b>F1000</b> |
|---------------|-------------|-------------|-------------|-------------|--------------|
| FWHM          | 6.77        | 11.38       | 14.35       | 16.07       | 17.26        |

**Table S3 bond energy of covalent bond in PN foam [1]**

| <b>Bond type</b>                | <b>C-N</b> | <b>C-O</b> | <b>C-C</b> | <b>N-H</b> | <b>C-H</b> | <b>O-H</b> | <b>C=C</b> | <b>C=N</b> | <b>C=O</b> | <b>C≡N</b> |
|---------------------------------|------------|------------|------------|------------|------------|------------|------------|------------|------------|------------|
| <b>Bond energy<br/>(kJ/mol)</b> | 305        | 326        | 332        | 391        | 414        | 464        | 611        | 615        | 728        | 891        |

**Reference**

[1] Sanderson R. Chemical bonds and bonds energy. Elsevier, 2012.

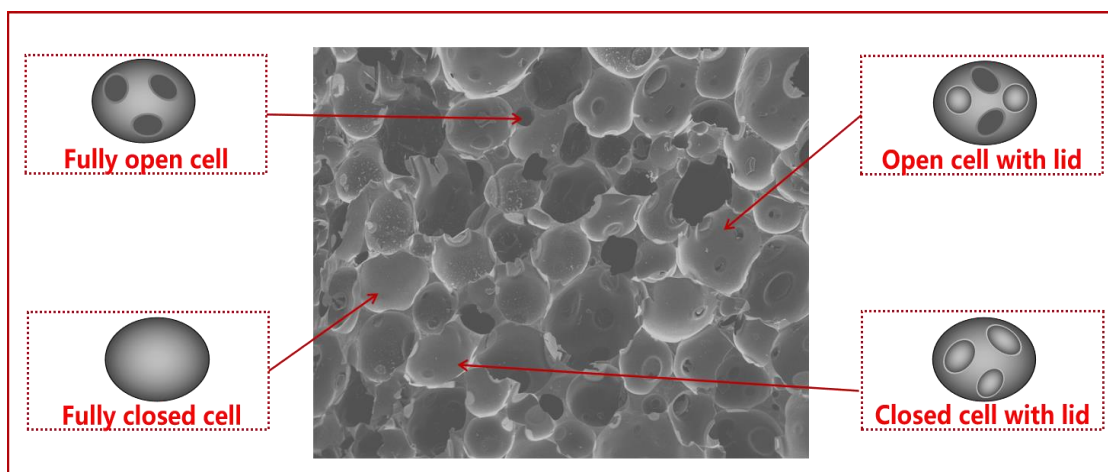

**Figure. S1. Bubble types in PN foams**

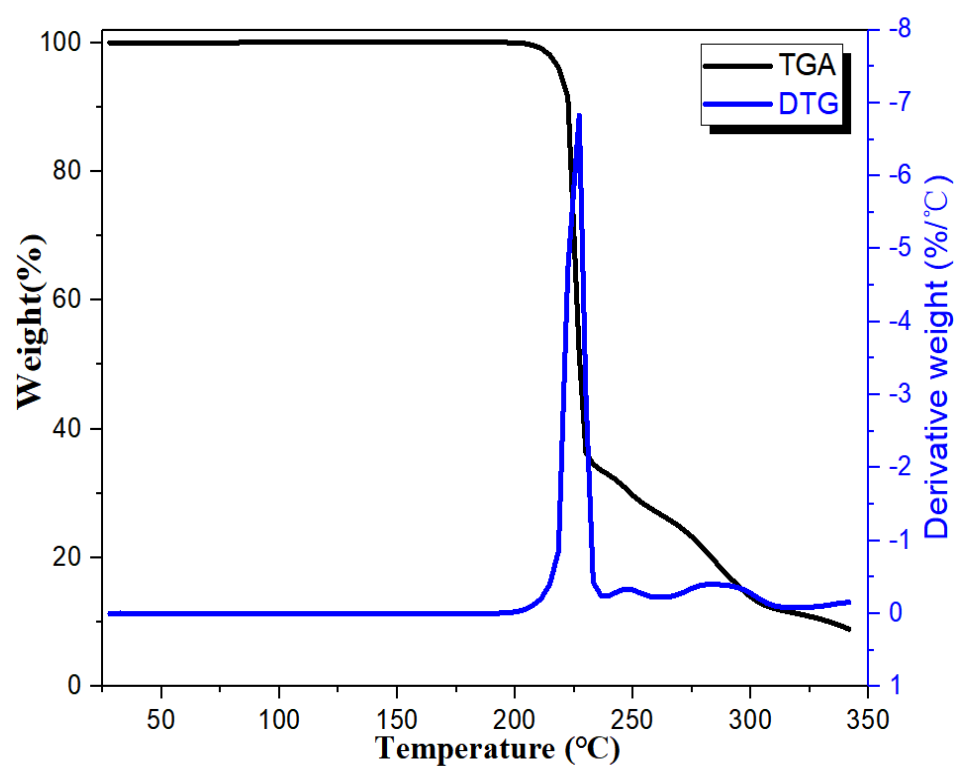

Figure. S2 TGA/DTG curves of azodicarbonamide

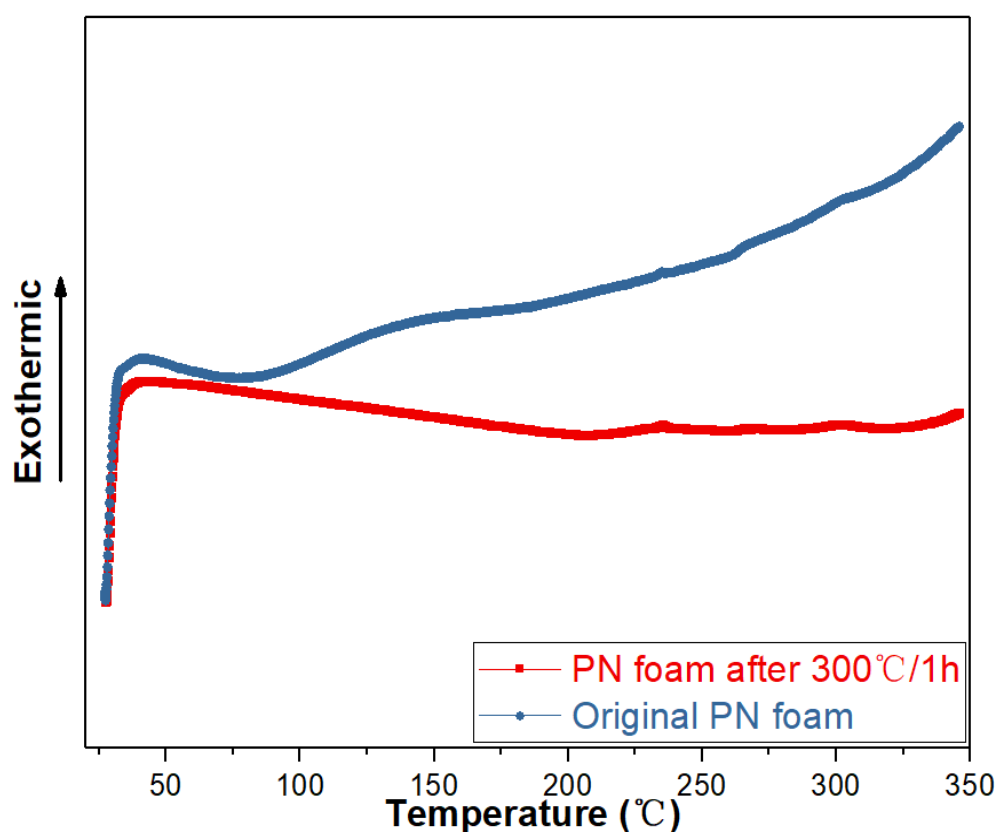

Figure. S3. DSC curve of (a) original PN foam and (b) PN foam after after thermal treatment at 300 °C/1h

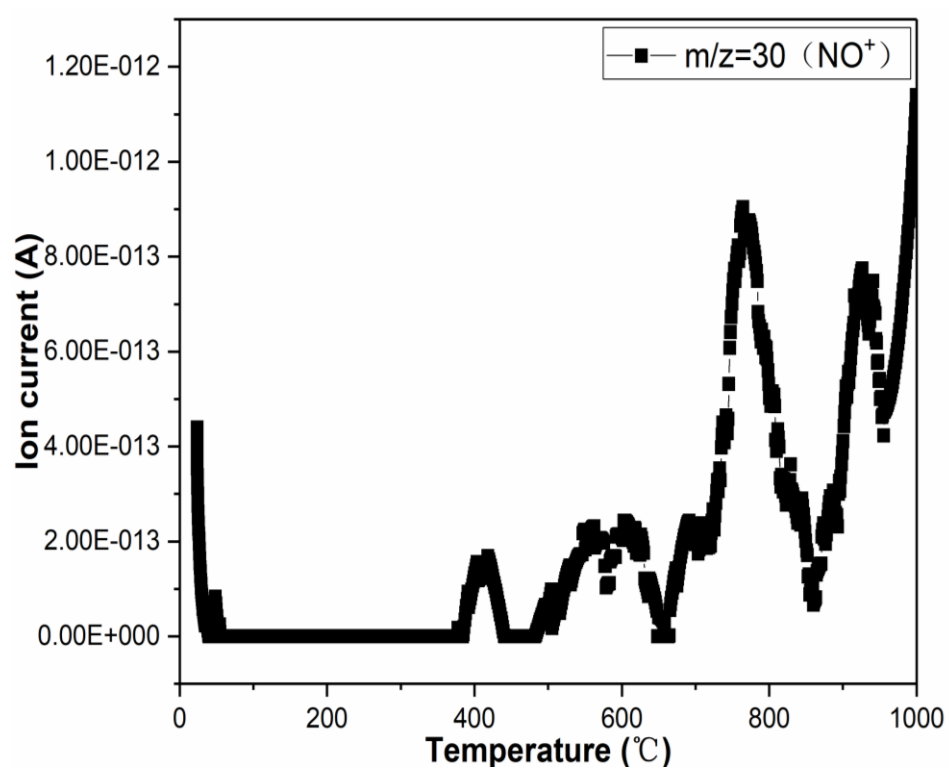

Figure. S4 The ionic signal of NO



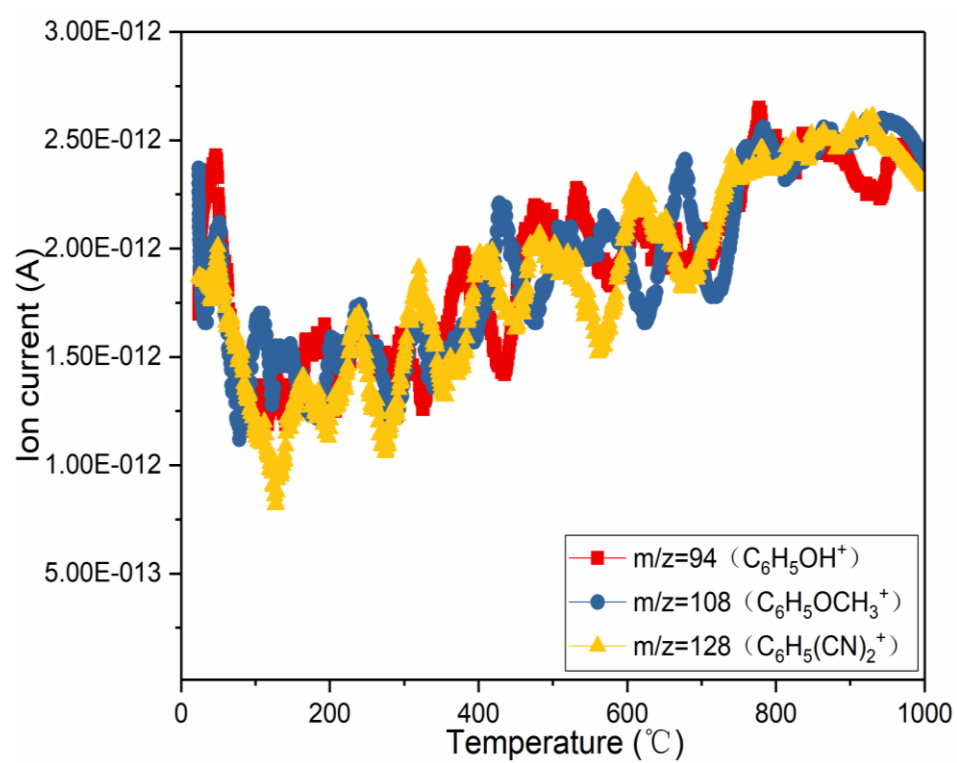

Figure. S5 The ionic signals of aromatics
